# Supplementary material
Source: PubMed Central journal article supplement (PMC2757156)
Supplement: NIHMS120533-supplement-Supplementary_data_legend.pdf [file NIHMS120533-supplement-Supplementary_data_legend.pdf]

Supplementary Figure 1. Top panel: Immunoblot showing MnSOD protein in selected clones. Bottem panel: Immunoblot showing actin as a loading control.
