# Supplementary material
Source: PubMed Central journal article supplement (PMC2757156)

Supplementary data Figure 1: Jaramillo et al

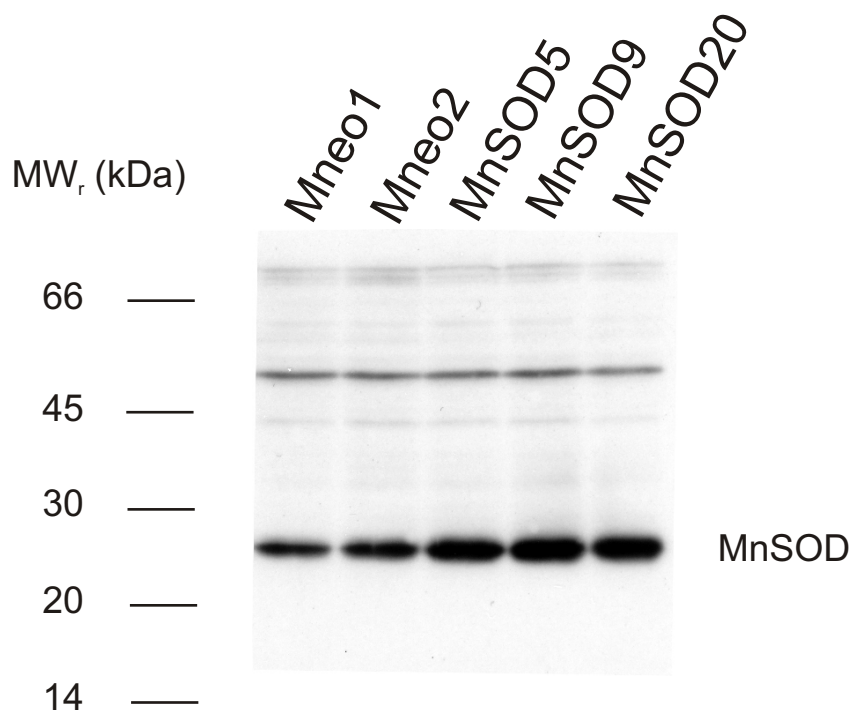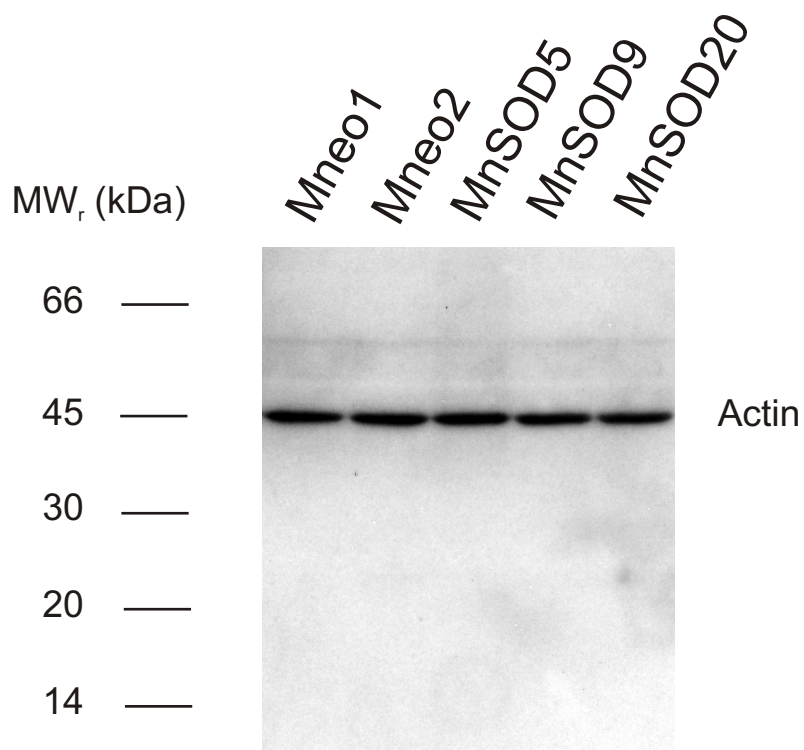

Supplement: NIHMS120533-supplement-Supplementary_Figure_1.pdf [file NIHMS120533-supplement-Supplementary_Figure_1.pdf]
